# Supplementary material for: Unravelling mechanisms underlying the action principles of a community-based health promotion programme: a realist evaluation
Source: Springer Nature journal article supplement (doi:10.1186/s13690-023-01027-0), 2023-01-19
Supplement: MOESM1 [file 23937232]

## Appendix 1. Programme Outputs

| 2016                                                                      | 2017 | 2018 | 2019 | Responsible worker* | Inhabitants involved** |
|---------------------------------------------------------------------------|------|------|------|---------------------|------------------------|
| Toy lending point                                                         |      |      |      | HB                  | 6 V                    |
| Budget cooking workshops                                                  |      |      |      | HB                  | 26 P                   |
| Mothers 'on the move'                                                     |      |      |      | SST                 | 35 P                   |
| Mancave cooking workshops                                                 |      |      |      | HB                  | 23 P                   |
| Voorstad kids                                                             |      |      |      | HB                  | 65 P                   |
| Gardening project                                                         |      |      |      | WF                  | 6 P                    |
| Outdoor playing 'Molentuin'                                               |      |      |      | HB-S                | 15 P, 4 V              |
| Physical activity workshops                                               |      |      |      | HB-S                | 15 P                   |
| Group sessions 'Perspectives on health'                                   |      |      |      | HB, HB-S, SST, AR   | 89 P                   |
| Neighbourhood communication boards                                        |      |      |      | HB, SST             | 8V                     |
| Intersectoral collaboration and network analysis                          |      |      |      | AR                  | 6 coalition members    |
| Looking for sense course                                                  |      |      |      | HB, SST             | 24 P, 1 V              |
| Beestenmarkt reconstruction, watertap and opening 'party'                 |      |      |      | ST, WF, HB-S        | 5 V                    |
| First aid 'kids' course                                                   |      |      |      | WF                  | 6 V                    |
| Chair gymnastics                                                          |      |      |      | SST, HB-S           | 40 P                   |
| Healthy eating workshop kids                                              |      |      |      | SST, HB             | 8 P                    |
| Healthy 'high tea for elderly                                             |      |      |      | SST                 | 8P                     |
| Photovoice project: health supporting environment                         |      |      |      | HB, AR              | 16 P                   |
| Benefits of Participation study                                           |      |      |      | HB, AR              | 100 + 12 P             |
| Project <i>Well-being or not being ill?</i> Primary care-welfare alliance |      |      |      |                     | 15 CW                  |
| Course 'healthy nutrition'                                                |      |      |      | HB-S, WF            | 10 P                   |

|  |  |  |  |                                                       |         |      |
|--|--|--|--|-------------------------------------------------------|---------|------|
|  |  |  |  | Training: 'Leader recreation and physical activities' |         | 7 V  |
|  |  |  |  | Group sessions 'How about health?'                    | SST, AR | 29 P |
|  |  |  |  | Movie 'Keep Voorstad moving'                          |         |      |
|  |  |  |  | Municipal involvement and bridging budget 2020        |         |      |

\* HB=Health broker, HB-S=Health Brokers-sports, SST=Social support team, WF=welfare worker, AR=Action Researcher

\*\* V= volunteers, P=participants, CW = community workers

 = health promoting activities
  = research activities
  = additional activities

 = continuation activities
